# Supplementary material for: Sodium-myoinositol cotransporter-1, SMIT1, mediates the production of reactive oxygen species induced by hyperglycemia in the heart
Source: PubMed Central journal article supplement (PMC5269587; doi:10.1038/srep41166), 2017-01-27

**Title:**

Sodium-myoinositol cotransporter-1, SMIT1, mediates the production of reactive oxygen species induced by hyperglycemia in the heart

**Authors:**

Anne Van Steenbergen, Magali Balteau, Audrey Ginion, Laura Ferté, Sylvain Battault, Christophe de Meester de Ravenstein, Jean-Luc Balligand, Evangelos-Panagiotis Daskalopoulos, Patrick Gilon, Florin Despa, Sanda Despa, Jean-Louis Vanoverschelde, Sandrine Horman, Hermann Koepsell, Gerard Berry, Louis Hue, Luc Bertrand, Christophe Beauloye

Supplementary table 1: Patients' characteristics

| <b>Basic clinical characteristics</b> | <b>Study population</b> |
|---------------------------------------|-------------------------|
|                                       | <b>n=7</b>              |
| Age, yr                               | 62 ± 9                  |
| Male Gender, n(%)                     | 5 (71)                  |
| BMI, kg/m <sup>2</sup>                | 28 ± 5                  |
| Active smoking, n (%)                 | 0 (0)                   |
| Diabetes, n (%)                       | 1 (14)                  |
| Family history of MI, n (%)           | 1 (14)                  |
| Hypertension, n (%)                   | 3 (43)                  |
| Hypercholesterolemia, n (%)           | 1 (14)                  |
| LVEDV (ml)                            | 205 ± 74                |
| LVESV (ml)                            | 86 ± 31                 |
| EF, %                                 | 59 ± 7                  |
| Left ventricular mass (g)             | 142 ± 37                |

Supplementary table 2: Primer sequences and PCR conditions

| <b>Amplified genes</b> | <b>Sense (S) / antisense (AS)</b> | <b>Rats</b>              | <b>Mice</b>          | <b>Humans</b>          | <b>Annealing temp. (°C)</b> |
|------------------------|-----------------------------------|--------------------------|----------------------|------------------------|-----------------------------|
| <b>SGLT1</b>           | S                                 | TCTTCGCTATCAGCGTCGTC     | GCCATCATCCTCTTCGTCAT | TGCTGGTGGGGTCTTTAATC   | 57;64.4;59                  |
|                        | AS                                | TGCGCTCTTCTGTGCTGTTA     | TTGGAGTCCTCTGGGATGTC | GCCAACCTTGGTACCGCAAT   |                             |
| <b>SGLT2</b>           | S                                 | CGCCATCATTCTCTTCTTCTGCT  | ATTGTCTCGGGCTGGTATTG | TCCTCACCTCACGGTCTC     | 61;59;59                    |
|                        | AS                                | CCTGCCGTATTTTTGCCCTTTT   | TTAGAGCAGCCCACCTCAGT | CTGGGGCTCATTTCATCTCCA  |                             |
| <b>SGLT3</b>           | S                                 | GAACATGTCCCACGTGAAGGC    | CTGTTGGAGGCTTCTTCCTG | CTCGCTGGTCGTGATATGGCC  | 57;60;64.3                  |
|                        | AS                                | TGCAGAAGATGGCAAGCAAGAAC  | GGAGAAACACCCAACCAAGA | GCCAACATCAACGCCACAGTG  |                             |
|                        | Nested-S                          | ATGCTGTCCGGTCATGTTGGC    | -                    | -                      |                             |
|                        | Nested-AS                         | GATGTAGTGGAAGAGCTGTCC    | -                    | -                      |                             |
| <b>SGLT4</b>           | S                                 | ACCTGTCACCTCCCACGG       | CCTGGTGGACAAGGAACTGT | CCCTTGGCCAGGTCTCATTT   | 57;59;59                    |
|                        | AS                                | ATATTGGAGCATCCAACCTCTGGC | GAACCAGTTCCACAGCCATT | CCCACTGTTGGAGCTTTGGA   |                             |
|                        | Nested-S                          | ATGCCTTCCACATGCTTCGAG    | -                    | -                      |                             |
|                        | Nested-AS                         | TGACAGATGTCAGGGTCCAC     | -                    | -                      |                             |
| <b>SGLT5</b>           | S                                 | TTTTGCCTTGAATGTGGCCG     | GATCGGAGCCTCACTCTTTG | TACGCGGGGGCTCTGTTTGT   | 65;59;59                    |
|                        | AS                                | GCTCGTAGACACTCGGATGG     | GCATCAGGGACAGGACAGAT | GGGAGCTGGTCACTGACTGCAT |                             |
| <b>SGLT6</b>           | S                                 | TGATTGTGGGCAGGGTGTTT     | CCCAAACCTTGTGCTGGAAC | CGGTCCTGGTGAAGAGCATT   | 61.2;59;59                  |
|                        | AS                                | CGTGATGAGGGTGGTAGACG     | GATCCAGAGGATGGAGACCA | GGCATCCCGTTCTGAGAGAG   |                             |
| <b>SMIT1</b>           | S                                 | CCAGCCTCGGTATGGTACTG     | CGTGGCTACGGCATTATTTT | GGGGTTGGTACAGTAGGCTTC  | 60.8;62.5;55.8              |
|                        | AS                                | GCATCTCCACAATAATTGGC     | CAGACTTCCCGTTGGGAATA | GGGCCACTATGGCAATGTCT   |                             |

Supplementary table 3: Primer sequences and qPCR conditions

| <b>Amplified genes</b> | <b>Sense (S) / antisense (AS)</b> | <b>Rats</b>          | <b>Mice</b>          | <b>Humans</b>        | <b>Annealing temp. (°C)</b> |
|------------------------|-----------------------------------|----------------------|----------------------|----------------------|-----------------------------|
| <b>SGLT1</b>           | S                                 | TCTTCGCTATCAGCGTCGTC | GCCATCATCCTCTTCGTCAT | TGCTGGTGGGGTCTTTAATC | 57;64.4;64.4                |
|                        | AS                                | TGCGCTCTTCTGTGCTGTTA | TTGGAGTCCTCTGGGATGTC | GGATCTCGGAAGATGTGGAA |                             |
| <b>SMIT1</b>           | S                                 | TGGTGACGAAGGAGAGTTGC | CGTGGCTACGGCATTATTTT | GCTCATGCCAAAGGCTCTAC | 62;62.5;64.4                |
|                        | AS                                | GGTTGGAGCCCTTAATGCT  | CAGACTTCCCGTTGGGAATA | CACAGGAACCAGCTTCATCA |                             |
| <b>hPRT1</b>           | S                                 | GTCCCAGCGTCGTGATTAGT | -                    | -                    | 60                          |
|                        | AS                                | ACAGAGGGCCACAATGTGAT | -                    | -                    |                             |
| <b>RPL32</b>           | S                                 | -                    | GGCACCAGTCAGACCGATAT | AGGCATTGACAACAGGGTTC | 60;62.5                     |
|                        | AS                                | -                    | CAGGATCTGGCCCTTGAAC  | GTTGCACATCAGCAGCACTT |                             |

Supplementary table 4: Echocardiographic data of SGLT1<sup>-/-</sup> and <sup>+/+</sup> mice

| <b>Parameter</b>                                             | <b>WT SGLT1</b> | <b>WT SGLT1</b>     | <b>KO SGLT1</b>     |
|--------------------------------------------------------------|-----------------|---------------------|---------------------|
|                                                              |                 | (glu-gal free diet) | (glu-gal free diet) |
| <b>M-mode</b>                                                | (n=10)          | (n=10)              | (n=10)              |
| End-diastolic interventricular septal thickness (mm)         | 0.61 ± 0.04     | 0.57 ± 0.03         | 0.56 ± 0.04         |
| End-systolic interventricular septal thickness (mm)          | 0.82 ± 0.05     | 0.81 ± 0.05         | 0.78 ± 0.06         |
| End-diastolic left ventricular internal diameter (mm)        | 4.32 ± 0.12     | 4.14 ± 0.09         | 4.14 ± 0.07         |
| End-systolic left ventricular internal diameter (mm)         | 3.3 ± 0.13      | 3.16 ± 0.08         | 3.27 ± 0.09         |
| End-diastolic left ventricular posterior wall thickness (mm) | 0.66 ± 0.05     | 0.66 ± 0.03         | 0.59 ± 0.01         |
| End-systolic left ventricular wall thickness (mm)            | 0.92 ± 0.05     | 0.91 ± 0.04         | 0.81 ± 0.02*        |
| Fractional shortening (%)                                    | 23.82 ± 1.6     | 23.68 ± 1.7         | 21.16 ± 1.52        |
| <b>2D-parasternal long axis</b>                              |                 |                     |                     |
| Left ventricular end-diastolic volume (μl)                   | 72 ± 4          | 60 ± 4              | 62 ± 3              |
| Left ventricular end-systolic volume (μl)                    | 39 ± 2          | 34 ± 2              | 34 ± 2              |
| Ejection fraction (%)                                        | 45 ± 1          | 44 ± 1              | 45 ± 2              |
| Left ventricular mass (mg)                                   | 93 ± 5          | 85 ± 3              | 83 ± 2              |
| Heart rate (BPM)                                             | 448 ± 12        | 399 ± 12            | 395 ± 9             |

\*p<0.05 vs WT

Supplementary table 5: echocardiographic data of SMIT1<sup>-/-</sup> and <sup>+/+</sup> mice

| <b>Parameter</b>                                             | <b>WT SMIT1</b> | <b>KO SMIT1</b> |
|--------------------------------------------------------------|-----------------|-----------------|
| <b>M-mode</b>                                                | (n=10)          | (n=10)          |
| End-diastolic interventricular septal thickness (mm)         | 0.58 ± 0.03     | 0.61 ± 0.03     |
| End-systolic interventricular septal thickness (mm)          | 0.75 ± 0.04     | 0.84 ± 0.04     |
| End-diastolic left ventricular internal diameter (mm)        | 4.18 ± 0.06     | 4.19 ± 0.11     |
| End-systolic left ventricular internal diameter (mm)         | 3.43 ± 0.07     | 3.45 ± 0.12     |
| End-diastolic left ventricular posterior wall thickness (mm) | 0.62 ± 0.032    | 0.56 ± 0.02     |
| End-systolic left ventricular wall thickness (mm)            | 0.80 ± 0.05     | 0.73 ± 0.03     |
| Fractional shortening (%)                                    | 18.00 ± 1.2     | 16.76 ± 1.4     |
| <b>2D-parasternal long axis</b>                              |                 |                 |
| Left ventricular end-diastolic volume (μl)                   | 66 ± 3          | 63 ± 3          |
| Left ventricular end-systolic volume (μl)                    | 40 ± 1          | 39 ± 2          |
| Ejection fraction (%)                                        | 39 ± 1          | 37 ± 1          |
| Left ventricular mass (mg)                                   | 91 ± 4          | 83 ± 3          |
| Heart rate (BPM)                                             | 406 ± 12        | 397 ± 21        |

## Supplementary Fig. 1

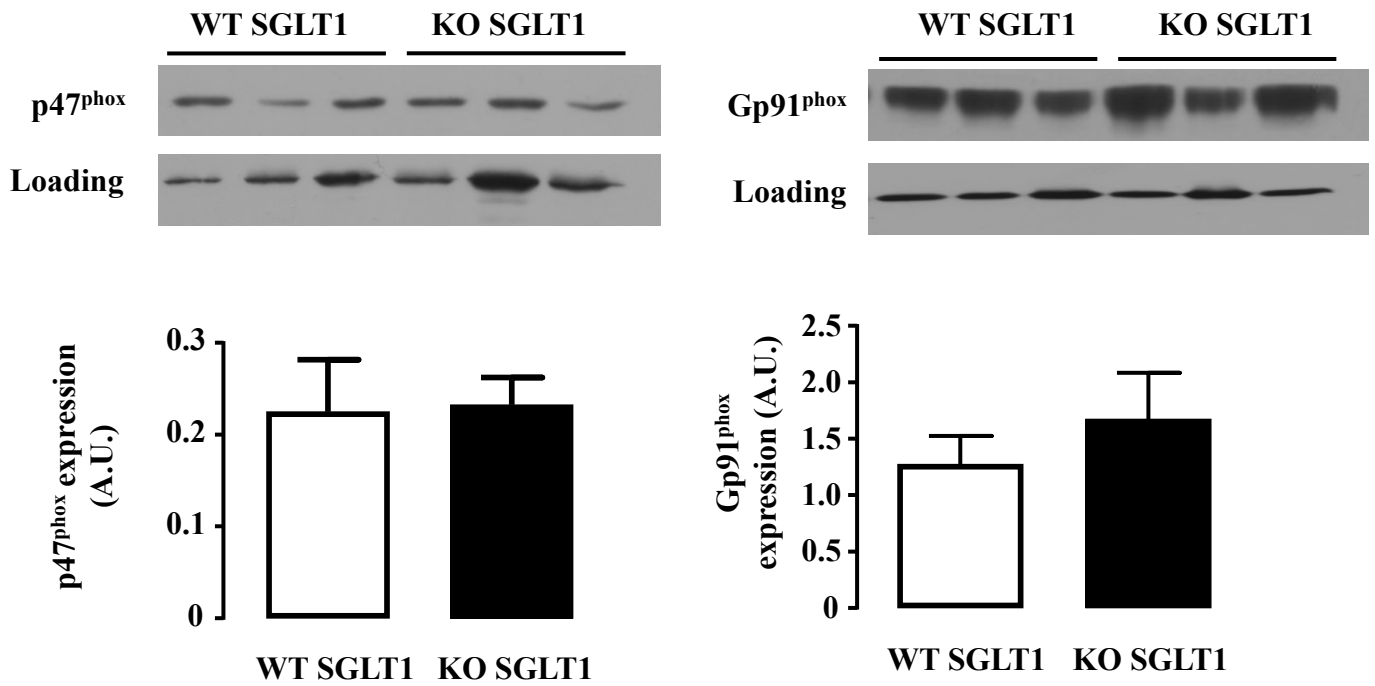

### Supplementary Figure 1. NOX2 subunits protein expression in SGLT1<sup>-/-</sup> cardiomyocytes

Western blot analysis of p47<sup>phox</sup> and gp91<sup>phox</sup> on cardiomyocytes isolated from SGLT1 WT and KO mice. Loading control corresponds to GADPH. Blots and data quantification are presented. Data are means  $\pm$  SEM. Statistical analysis was by Student's *t*-test.

## Supplementary Fig. 2

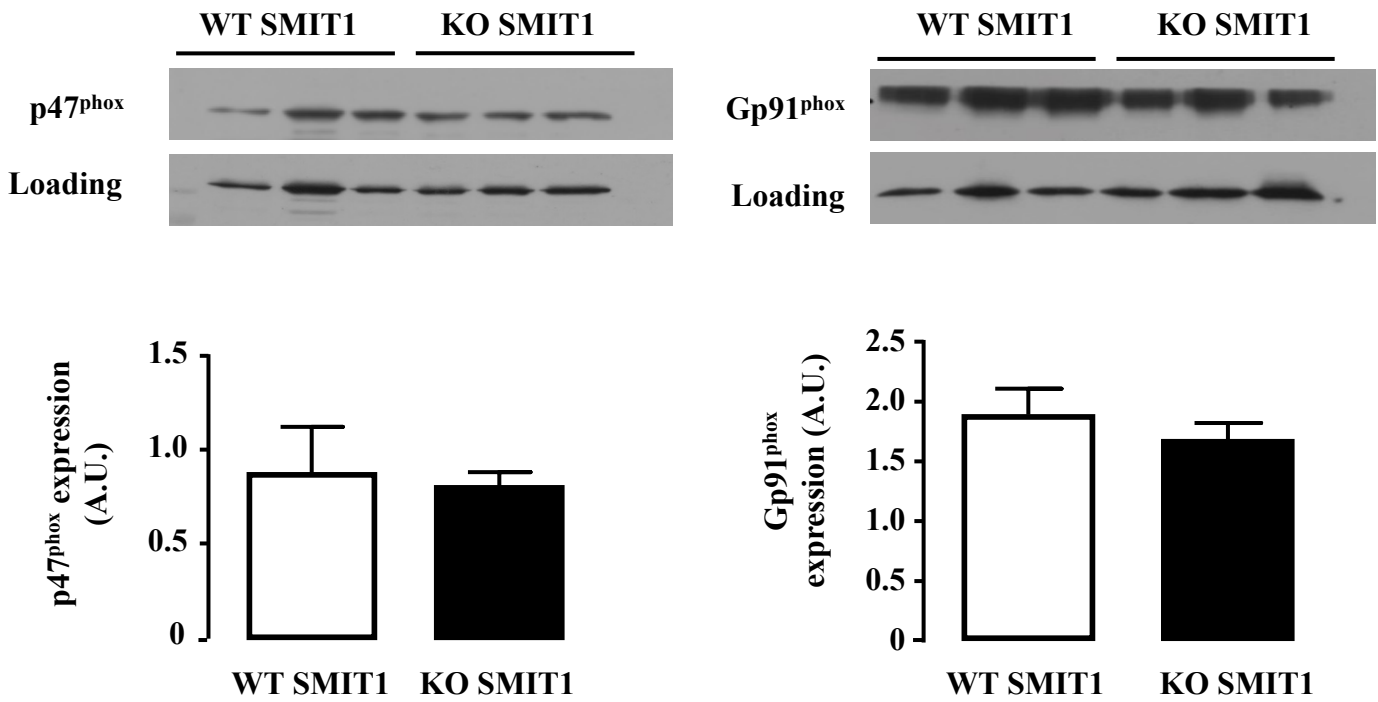

### Supplementary Figure 2. NOX2 subunits protein expression in SMIT1<sup>-/-</sup> cardiomyocytes

Western blot analysis of p47<sup>phox</sup> and gp91<sup>phox</sup> on cardiomyocytes isolated from SMIT1 WT and KO mice. Loading control corresponds to GADPH. Blots and data quantification are presented. Data are means  $\pm$  SEM. Statistical analysis was by Student's *t*-test.



### Supplementary Fig. 3

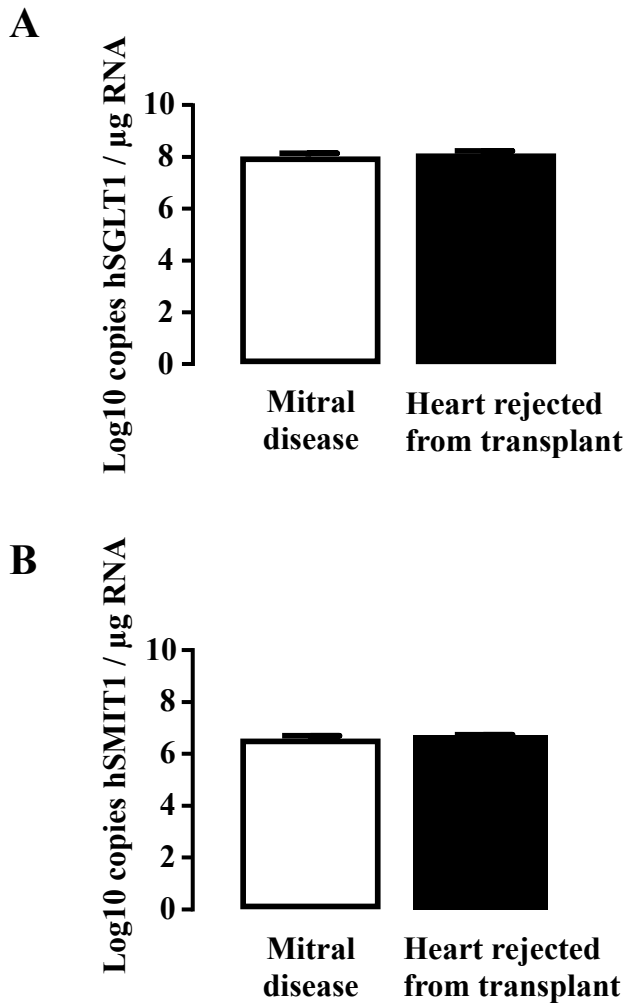

#### Supplementary Figure 3. Quantification of SMIT1 expression in human heart

mRNA copy numbers/ $\mu\text{g}$  of (A) SGLT1 or (B) SMIT1 RNA were measured in hearts from patients suffering from mitral disease (n=7) or from heart rejected from transplant (n=3). Data were normalized to RPL32 and expressed as Log10 copy numbers/ $\mu\text{g}$  RNA. Data are means  $\pm$  SEM. Statistical analysis was by Student's *t*-test.

**Supplementary Fig. 4 (blots from Fig. 1E)**

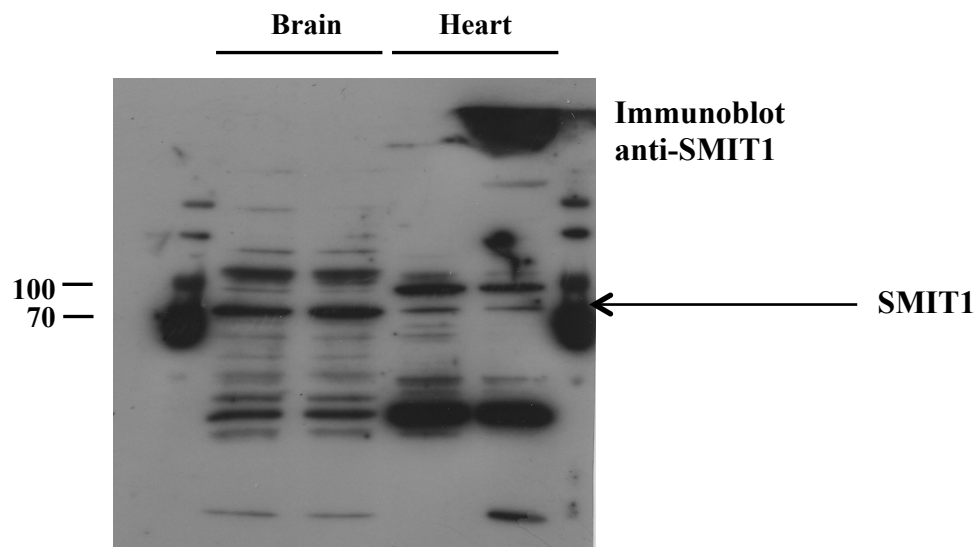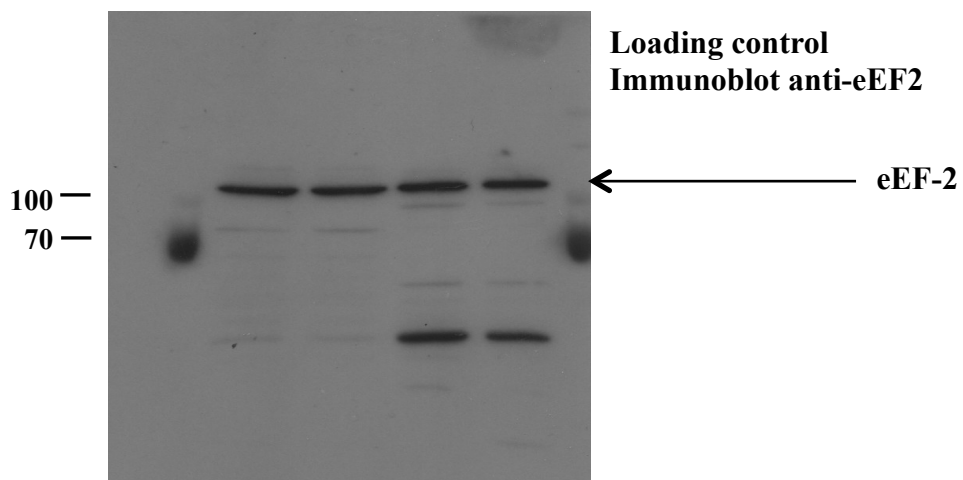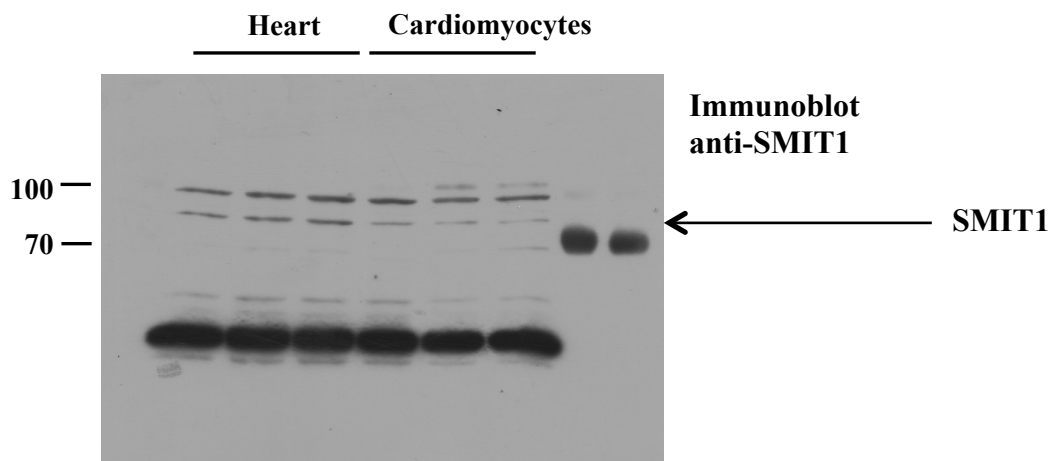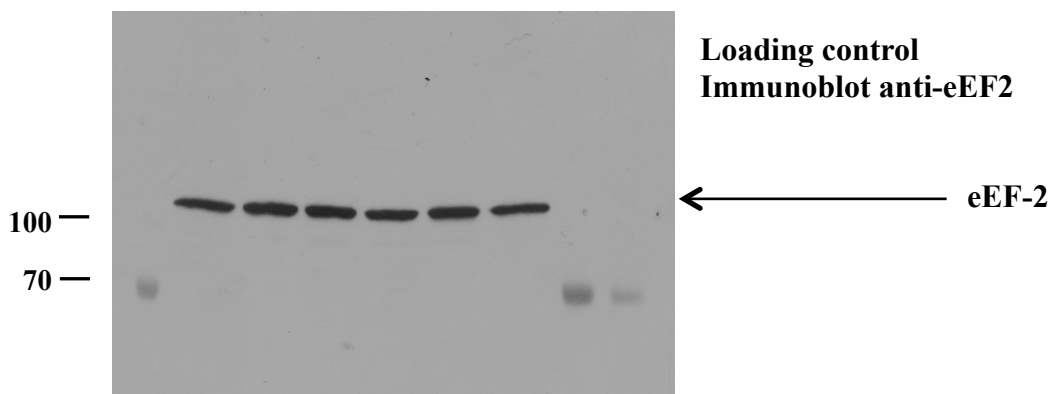

**Supplementary Fig. 5 (blots from Fig. 2E)**

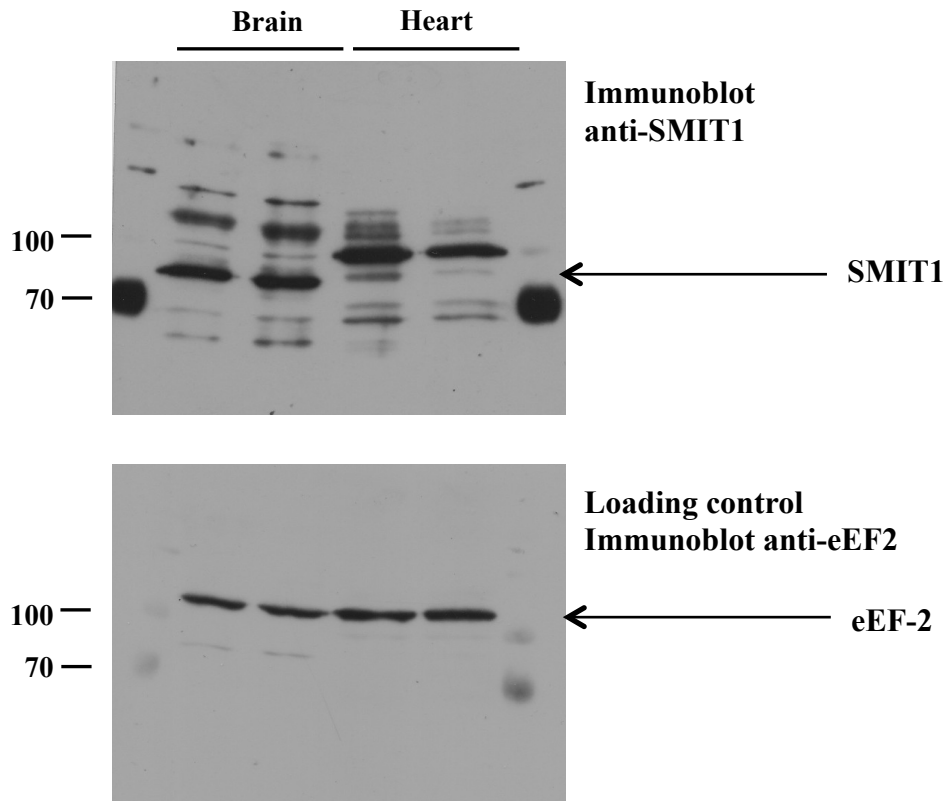

**Supplementary Fig. 6 (blots from Fig. 6B)**

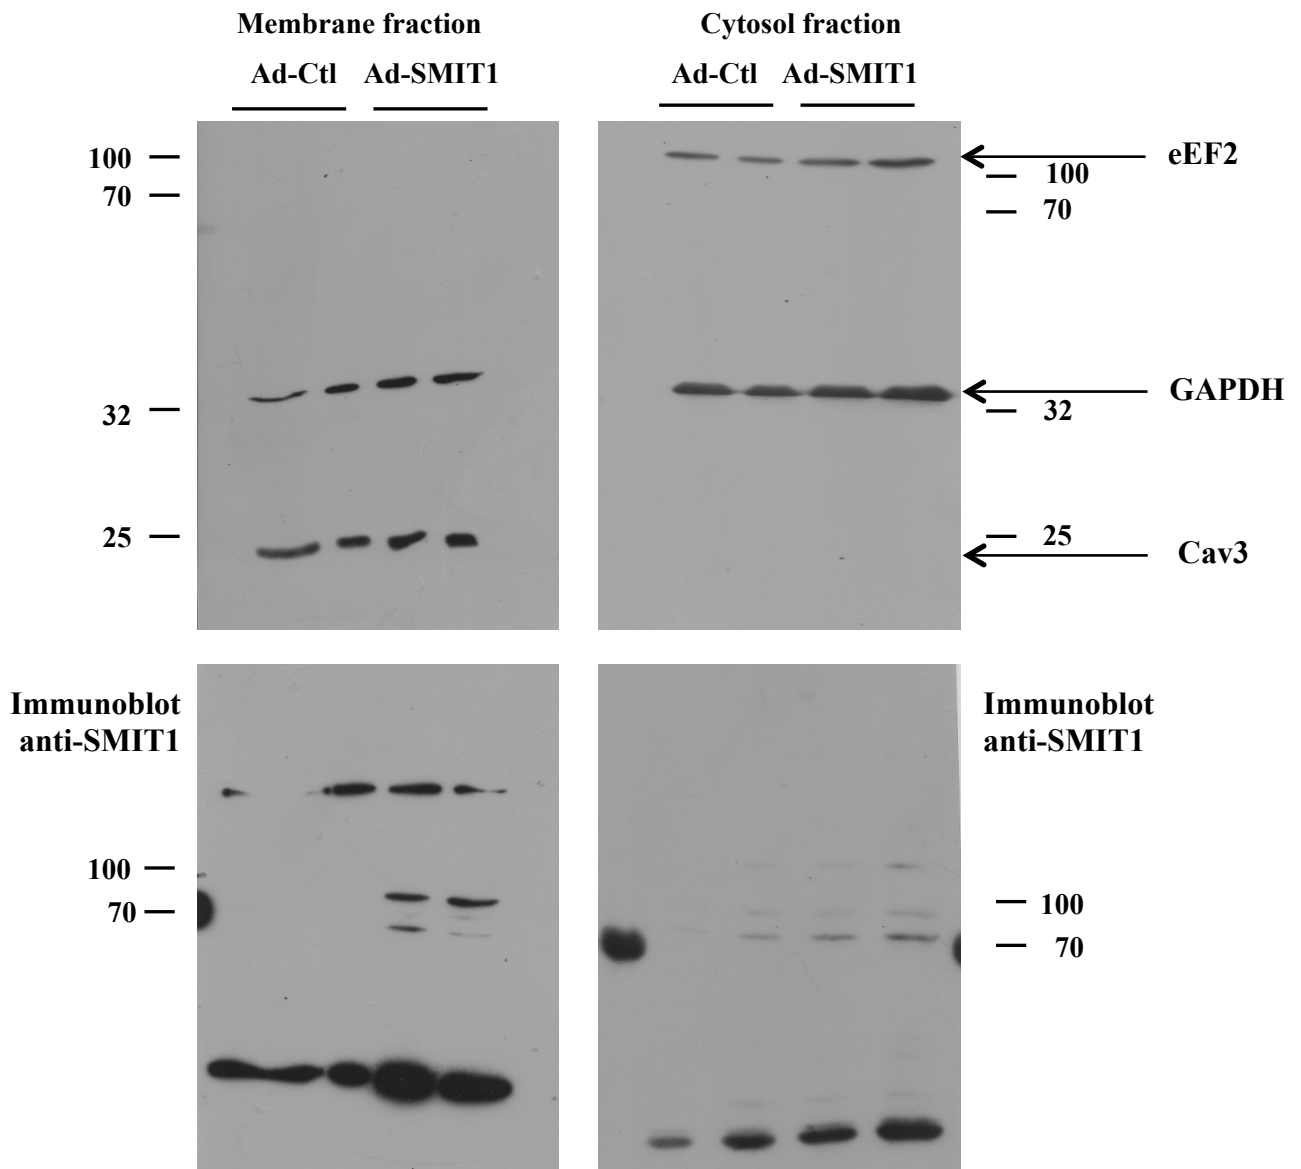

Supplement: srep41166-s1.pdf [file srep41166-s1.pdf]
